# Supplementary material
Source: PubMed Central journal article supplement (PMC10759932)

# Unprocessed immunoblots

Related to: Extended Data Fig. 3b

## Published figure panel

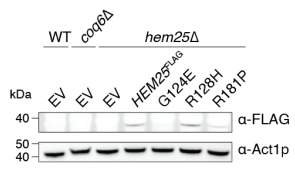

## Raw images

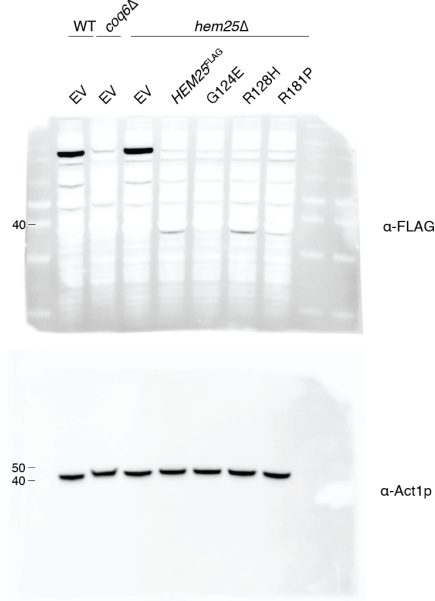

Related to: Extended Data Fig. 3c

Published figure panel

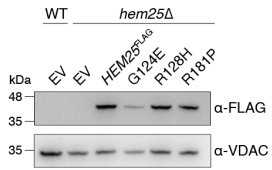

Raw images

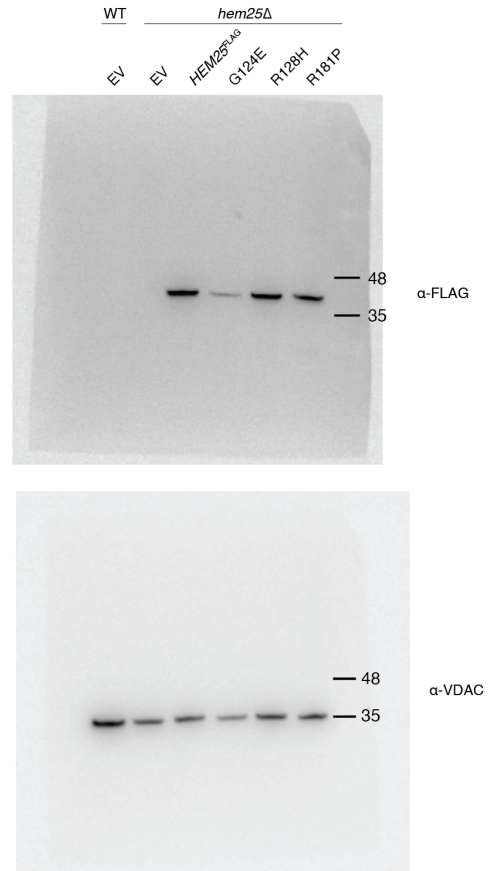

Related to: Extended Data Fig. 3f

Published figure panel

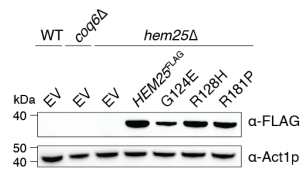

Raw images

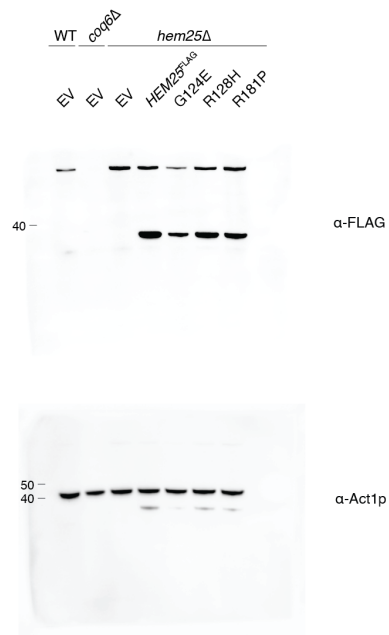

Related to: Extended Data Fig. 3g

Published figure panel

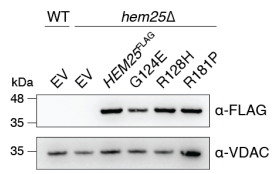

Raw images

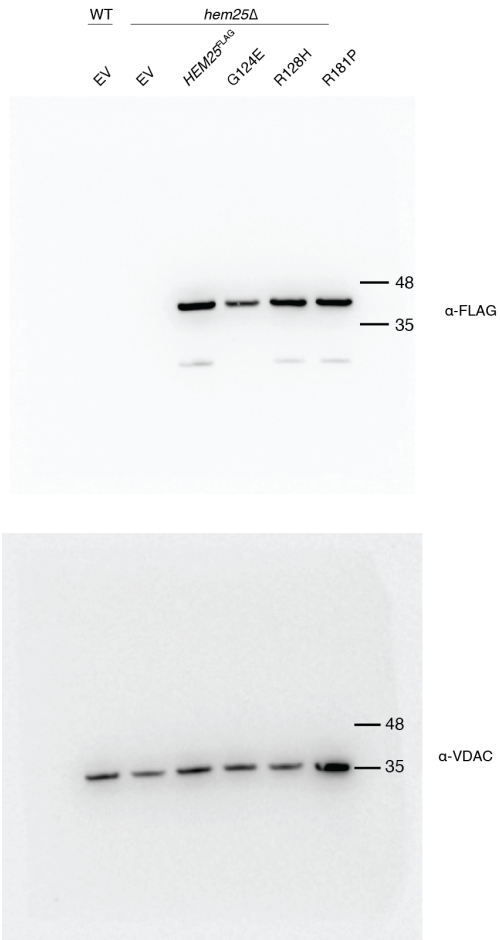

Published figure panel

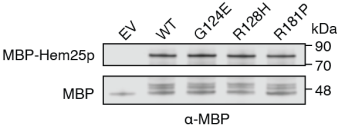

Raw images

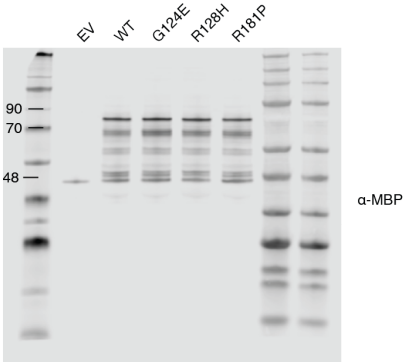

Supplement: NIHMS1946746-supplement-ED_Fig_3_Source_Blot.pdf [file NIHMS1946746-supplement-ED_Fig_3_Source_Blot.pdf]
