# Supplementary material
Source: PubMed Central journal article supplement (PMC10759932)

# Unprocessed immunoblot

Related to: Extended Data Fig. 1g

Published figure panel

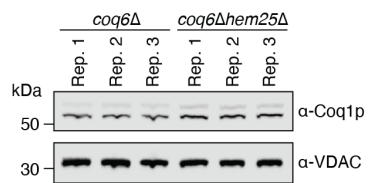

Raw image

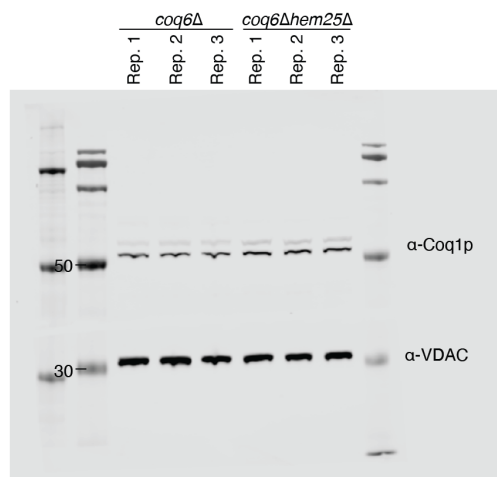

Supplement: NIHMS1946746-supplement-ED_Fig_1_Source_Blot.pdf [file NIHMS1946746-supplement-ED_Fig_1_Source_Blot.pdf]

# Unprocessed immunoblot

Related to: Extended Data Fig. 2a

Published figure panel

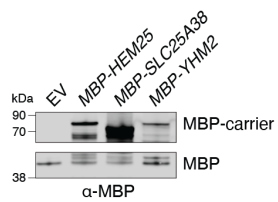

Raw images

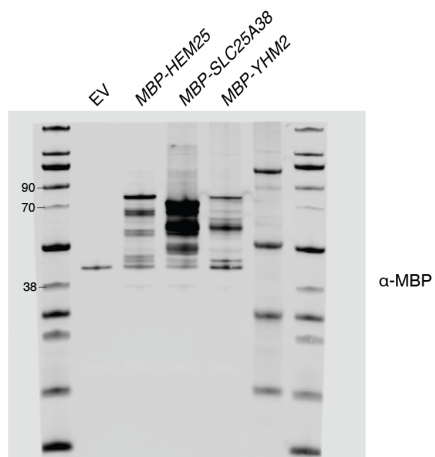

Supplement: NIHMS1946746-supplement-ED_Fig_2_Source_Blot.pdf [file NIHMS1946746-supplement-ED_Fig_2_Source_Blot.pdf]
